# Supplementary material for: Possible Involvement of Opa-Interacting Protein 5 in Adipose Proliferation and Obesity
Source: PubMed Central journal article supplement (PMC3916335; doi:10.1371/journal.pone.0087661), 2014-02-06
Supplement: pone.0087661.s002.pdf [file pone.0087661.s002.pdf]

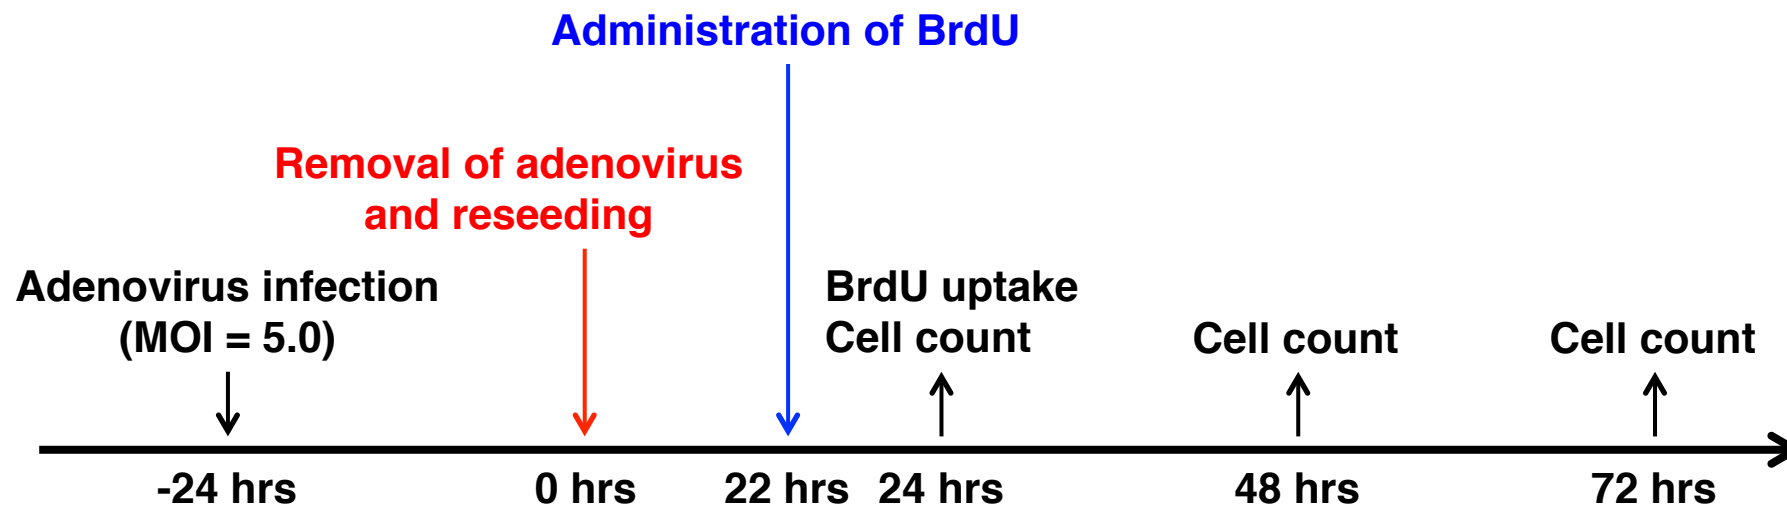

**CAR-3T3-L1 preadipocytes**

Figure S2
